# Supplementary material for: Tracking and characterization of a novel conjugative transposon identified by shotgun transposon mutagenesis
Source: Front Microbiol. 2024 Mar 26;15:1241582. doi: 10.3389/fmicb.2024.1241582 (PMC11005914; doi:10.3389/fmicb.2024.1241582)
Supplement: Supplementary file 1 [file Table_1.XLSX]

## Sheet: Table_S1
Table S1: Bacterial Strains, Plasmids, and Primers Used in this Study
Strain Name	Short name in text	Notes	Source and/or reference
E. coli S17-1λpir			Simon et al. 1983
B. thetaiotaomicron VPI-5482 ∆tdk	B. thetaiotaomicron	"wild-type" deletion background; Used to generate B. thetaiotaomicron Tn mutant library	Eggerth and Gagnon, 1933
Bacteroides ovatus ATCC 8483	B. ovatus	Used to generate B. ovatus Tn mutant library	Eggerth and Gagnon, 1933
Phocaeicola vulgatus ATCC 8482 ∆tdk	P. vulgatus	"wild-type" deletion background; Used to generate P. vulgatus Tn mutant library and BVU3433 deletion	Eggerth and Gagnon, 1933
Bacteroides thetaiotaomicron VPI5482 pNBU2_tetQ	B. thetaiotaomicron VPI-5482 TetR	Recipient strain to screen Tn libraries for MGEs, TetR	This study
Bacteroides thetaiotaomicron 3731	B. thetaiotaomicron 3731 TetR	Recipient strain to screen Tn libraries for MGEs, Naturally TetR	Meng et al. 2015
Parabacteroides merdae ATCC 43184	Parabacteroides merdae 43184 TetR	Recipient strain to screen Tn libraries for MGEs, Naturally TetR
Bacteroides thetaiotaomicron VPI-5482 ∆tdk ∆CPS pNBU2_tetQ	B. thetaiotaomicron ∆CPS TetR	Recipient strain to screen Tn libraries for MGEs, TetR	This study
Bacteroides uniformis ATCC 8492 pNBU2_tetQ	B. uniformis TetR	Recipient strain to screen Tn libraries for MGEs, TetR	This study
Bacteroides thetaiotaomicron VPI-5482 ∆tdk pNBU2_tetQ BoCTn:pSAM_ermG		Transconjugant from B. ovatus Tn library & B. thetaiotaomicron conjugation	This study
Bacteroides thetaiotaomicron VPI-5482 ∆tdk ∆CPSpNBU2_tetQ PvCTn:pSAM_ermG		Transconjugant from P. vulgatus Tn library & B. thetaiotaomicron ∆CPS conjugation	This study
Phocaeicola vulgatus ATCC 8482 ∆tdk PvCTn:∆BVU3433	P. vulgatus ∆BVU3433		This study
Phocaeicola vulgatus ATCC 8482 ∆tdk PvCTn:tetQ	P. vulgatus PvCTn:tetQ	Used as donor strain to calculate conjugation efficiency, TetR	This study
Phocaeicola vulgatus ATCC 8482 ∆tdk PvCTn:tetQ::∆BVU3433	P. vulagatus ∆BVU3433 PvCTn:tetQ	Used as donor strain to calculate conjugation efficiency, TetR	This study
Bacteroides thetaiotaomicron VPI-5482 ∆tdk pNBU2_ermG		Used as recipient strain to calculate conjugation efficiency, ErmR	Frye et al. 2022
Bacteroides thetaiotaomicron VPI-5482 pNBU2_ermG		"True wild-type" background with tdk intact; Used as recipient strain to calculate conjugation efficiency, ErmR	This study
Bacteroides thetaiotaomicron VPI-5482 ∆tdk ∆CPS pNBU2_ermG		"wild-type" tdk deletion background with all 8 CPS loci deleted; used as recipient Strain to calculate conjugation efficiency, ErmR	This study
Bacteroides thetaiotaomicron ∆tdk PvCTn:tetQ::∆BVU3433		Transconjugant from P. vulgatus ∆BVU3433 PvCTn:tetQ & B. thetaiotaomicron pNBU2_ermG conjugation	This study
Phocaeicola vulgatus ATCC 8482 ∆tdk PvCTn:tetQ::∆BVU3433 pNBU2-bla-CfxA_BVU3433		pNBU2_CfxA_BVU3433 complement	This study
Phocaeicola vulgatus ATCC 8482 ∆tdk PvCTn:tetQ::∆BVU3433 pNBU2-bla-CfxA		pNBU2_CfxA negative control	This study
Plasmid name		Notes
pSAM_BC2_ermG		Barcoded donor used to generate B. thetaiotaomicron Tn library; ermR	Cullen et al. 2015
pSAM_BC3_ermG		Barcoded donor used to generate B. ovatus library ; ErmR	Cullen et al. 2015
pSAM_BC4_ermG		Barcoded donor used to generate P. vulgatus library ; ErmR	Cullen et al. 2015
pExchange-tdk_Bv		Counterselectable homologous exchange vector for strain construction; AmpR ErmR FUdRS tdk	Campbell et al. 2020
pLGB13		Suicide vector used for allelic replacement in Bacteroidota, ErmR and contains aTC-inducible ss-Bfe1 counterselection	Leonor García-Bayona & Comstock 2019
pNBU2-bla-ermGb		Integrates cloned fragments to NBU2 att1 and/or att2 sites, AmpR ErmR	Koropatkin et al. 2008
pNBU2-bla-tetQ		Integrates cloned fragments to NBU2 att1 and/or att2 sites, AmpR TetR	Martens et al. 2008
pNBU2-bla-CfxA		Integrates cloned fragments to NBU2 att1 and/or att2 sites, AmpR CfxR	Campbell et al. 2020
Primer name		Sequence (5' - 3')*	Source and/or reference
Primers for pExchange-tdk_Bv BVU3433 deletion
NotI_BVU3433_LF_5'		TTAgcggccgcTGGGAGGATGACGAGGTTA	This work
SpeI_BVU3433_RF_3'		GACactagtCAGCCGGGATACAATTTGAC	This work
BVU3433_LF_SOE_3'		AGGCAACTATGGTTAATACTATGGTTACATAGCATCCGAACGAAATTTTTAAT	This work
BVU3433_RF_SOE_5'		ATTAAAAATTTCGTTCGGATGCTATGTAACCATAGTATTAACCATAGTTGCCT	This work
Primers for cloning SpeI & XmaI restriction sites on a PvCTn intergenic spacer (BVU3419-BVU3420)
XbaI_Addition_IS4_LF_5'		TGGtctagaGCTCGGTTGATAGGCTTTGG	This work
SalI_Addition_IS4_RF_3'		TTCgtcgacGGCTGTCGCGCAGTTTCTTC	This work
Addition_IS4_LF_SOE_3'_SpeI_XmaI		CCCAATTTGGCACAAATTGTGAAactagtCCGCcccgggAGGCTGCCGGAAAGTACTCC	This work
Addition_IS4_RF_SOE_5'_SpeI_XmaI		GGAGTACTTTCCGGCAGCCTcccgggGCGGactagtTTCACAATTTGTGCCAAATTGGG	This work
Primers for cloning TetR cassete (tetQ) onto SpeI & XmaI restriction sites
tetQ_pNBU2_R_SpeI		GGCactagtTTATTTTGATGACATTGATTTTTGGAACATG	This work
tetQ_pNBU2_F3_SpeI		AATactagtACGCGTTATCTCCTTAACGTAC	This work
Primers for amplifying BVU3433 for pNBU2_CfxA complementation
pNBU2_BVU3433_5'_LF_BamHI		AGGggatccAGGACTCAGGTTTACTCTACGAAACT	This work
pNBU2_BVU3433_3'_RF_NotI		AGGgcggccgcAGGCATCGTTGAAAAGTTGGC	This work
Primesr for RT-qPCR (16S, 3433, 3368, 3378)
BT 16S rRNA 5		GGTAGTCCACACAGTAAACGATGAA	Degnan et al. 2014
BT 16S rRNA 3		CCCGTCAATTCCTTTGAGTTTC	Degnan et al. 2014
BVU3433_F1		AGCAGCAGTGTCCATTCATG	This work
BVU3433_R1		CCTCCAGACGTTTGATCTCG	This work
BVU3366_F1		CTTTGCCAACCAGAAAGGAG	This work
BVU3366_R1		TTGTTGGGTTCGTATGACCA	This work
BVU3378_F1		GTACGGCCCTCAAACAGAAG	This work
BVU3378_R1		GTACCCCGTGGTAATCATGC	This work
AmpR, ampiciliin resistant; ErmR, erythromycin resistant; FUdRR, FUdR resistant; FUdRS, FUdR sensitive; CfxR, cefoxitin resistant
*Restriction sites are underlined and lower-case
